# Supplementary material for: CA3 hippocampal synaptic plasticity supports ripple physiology during memory consolidation
Source: PubMed Central journal article supplement (PMC10721822; doi:10.1038/s41467-023-42969-x), 2023-12-14
Supplement: 41467_2023_42969_MOESM1_ESM.pdf [file 41467_2023_42969_MOESM1_ESM.pdf]

## ***Supplementary Material***

### *Title*

CA3 hippocampal synaptic plasticity supports ripple physiology during memory consolidation.

### *Author list*

Hajer El Oussini<sup>1#</sup>, Chun-Lei Zhang<sup>1#3</sup> Urielle François<sup>1#</sup>, Cecilia Castelli<sup>1</sup>, Aurélie Lampin-Saint-Amaux<sup>1</sup>, Marilyn Lepleux<sup>1</sup>, Pablo Molle<sup>1</sup>, Legeolas Velez<sup>1</sup>, Cyril Dejean<sup>2</sup>, Frédéric Lanore<sup>1</sup>, Cyril Herry<sup>2</sup>, Daniel Choquet<sup>1#</sup> and Yann Humeau<sup>1#□</sup>.

### *Affiliations*

<sup>1</sup> : Univ. Bordeaux, CNRS, IINS, UMR 5297, F-33000 Bordeaux, France

<sup>2</sup> : Univ. Bordeaux, INSERM, Neurocentre Magendie, U1215, F-33000 Bordeaux, France

<sup>3</sup> : Present address : Sorbonne Université, CNRS, INSERM, Institut de Biologie Paris Seine (IBPS), Neurosciences Paris Seine (NPS), Team Synaptic Plasticity and Neural Networks, F-75005 Paris, France

#: Contributed equally to the work.

□: Corresponding author : [yann.humeau@u-bordeaux.fr](mailto:yann.humeau@u-bordeaux.fr)

### Inventory of Supporting Information

This word document includes 6 supplementary materials:

[Supplementary figure 1 + legend](#)

[Supplementary figure 2 + legend](#)

[Supplementary figure 3 + legend](#)

[Supplementary figure 4 + legend](#)

[Supplementary figure 5 + legend](#)

[Supplementary Table for statistics](#)

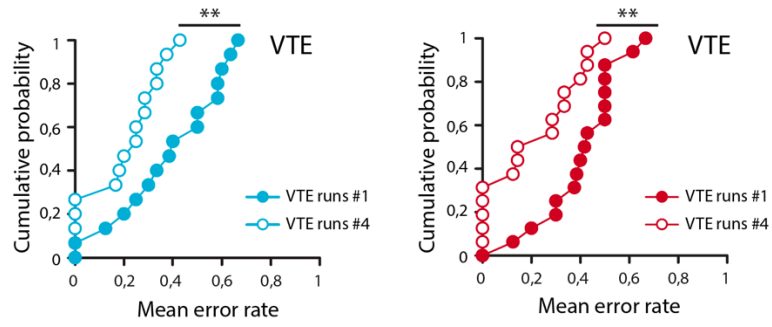

**Sup. Figure 1: dHPC AMPAR X-linking preserve DSA rule encoding.**

Same presentation as Figure 2. Cumulative single animal data for choice accuracy at VTE runs in session#1 and session#4 after pre-learning FaB- (blue, Left, n=16 independent animals) or IgG- (Red, right, n=17 independent animals) injections. t-tests were used. \*\*: p<0.01.



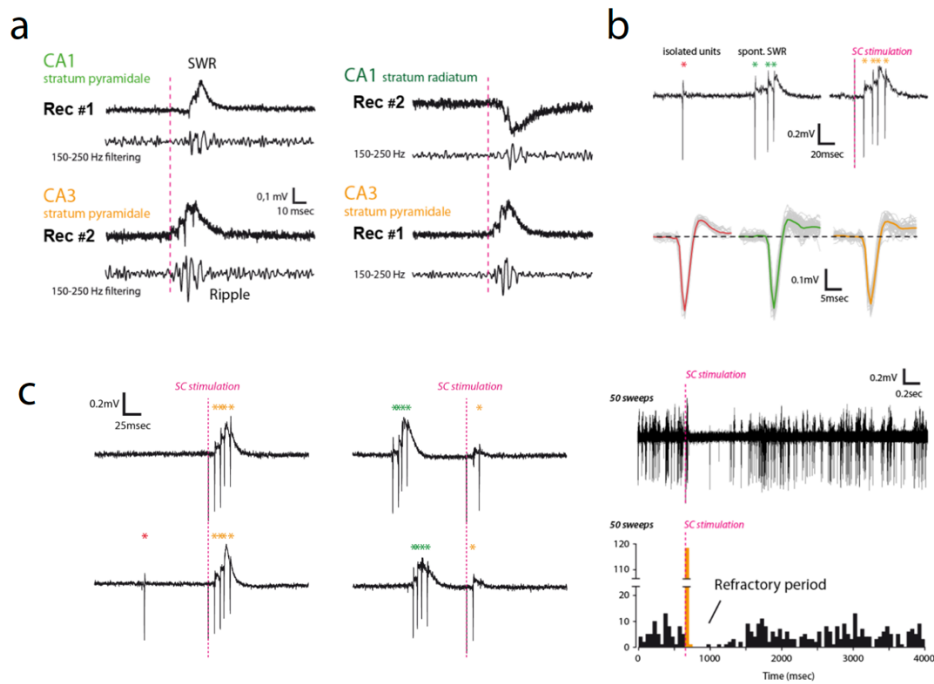

**Sup. Figure 3: Characteristics of SWRs recorded in hippocampal acute slices.**

**a:** SPW-Rs events recorded in acute hippocampal slice are composed of dendritic synaptic wave that polarity is changed depending on electrode position (upward in CA1-sp (left), downward in CA1-sr (right)). Filtering at 150-250 Hz shows high frequency oscillations (ripples) associated to the wave. Note that a significant delay exists between CA3 SWRs and those recorded in CA1 area, suggesting that they are occurring first in the CA3 region.

**b:** Typical example of a CA3-sp single unit recording showing that spontaneous or evoked (through CA3 axons stimulations) SWRs are indeed leading to focal neuronal activation. Bottom: waveforms of the single unit in the three conditions (alone, spontaneous SWRs and evoked SWRs). **c:** interaction between spontaneous and evoked SWRs. Typical example of refractory period observed for consecutive SWRs that probably limit their activity in acute slices. Left: examples of collision between spontaneous and evoked SWRs. Right: No spontaneous SWR is observed after the generation of an evoked SWR, suggesting that these oscillations may require time-dependent regenerative mechanisms.

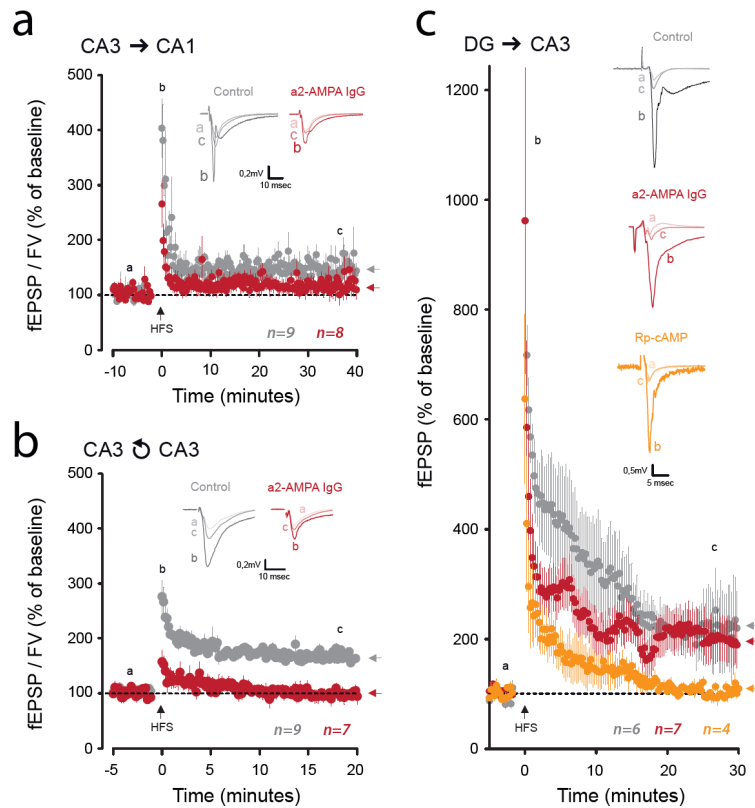

**Sup. Figure 4: AMPAR X-linking impair LTP at CA3→CA1, CA3→CA3 but not DG→CA3 synapses.**

**a:** Time course of fEPSP/FV slopes ratio before and after high frequency stimulations (HFS) in control (grey) and AMPAR X-linking conditions (red). Note the absence of potentiation in presence of anti GluA2 IgGs (arrows). In insert, representative traces obtained during baseline (a), immediately after HFS (b) and 35 minutes after HFS (c) in both conditions. **b:** Same presentation as in **a**. HFS stimulation was applied within the CA3 *stratum radiatum* to isolate CA3→CA3 recurrent synapses. Note the absence of potentiation in presence of anti GluA2 IgGs (arrows). In insert, representative traces obtained during baseline (a), immediately after HFS (b) and 20 minutes after HFS (c) in both conditions. **c:** Same presentation as in **a**. HFS stimulation was applied within the CA3 *stratum lucidum* to isolate DG→CA3 synapses. Note the potentiation that is still present in the anti GluA2 IgGs condition, but not when slice was preincubated with Rp-cAMP to block PKA activity (arrows). In insert, representative traces obtained during baseline (a), immediately after HFS (b) and 20 minutes after HFS (c) in all conditions. The number of independent experiments is indicated.

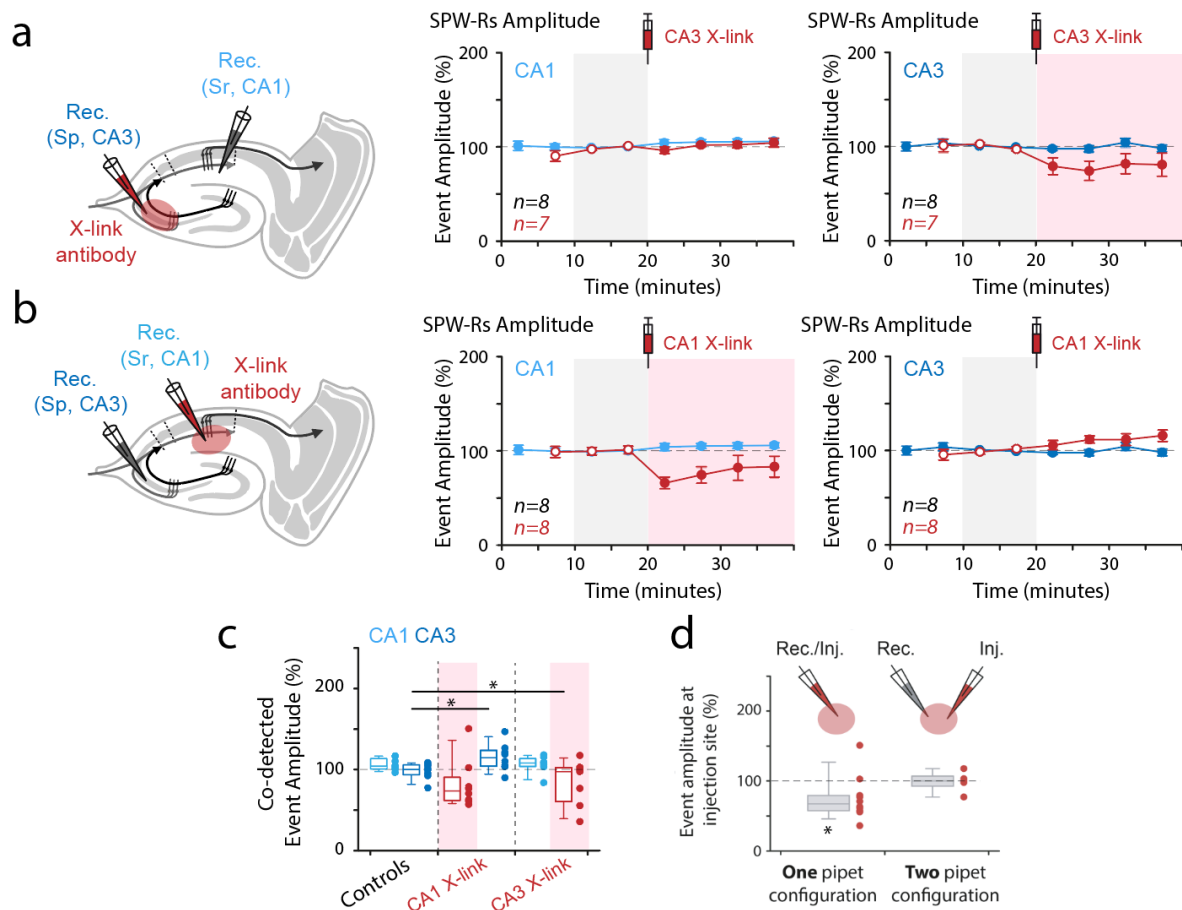

**Sup. Figure 5: AMPAR X-linking effect on SWR amplitude is due to injection procedure.**

**a-b:** Effect of AMPAR X-linking on spontaneous SPWRs amplitude was tested in *in situ* preparations by pressure injection of anti-GluA2 IgGs. Left: schematic of the experiment. Right: Time course of SPW-Rs amplitude in CA1 and CA3 regions. The “light red” area indicate that events are recorded in the IgG-injected area. All except red colour indicate time course of the same parameter in control conditions. Open red circles are the IgG preparations before the injections. **c:** All single experiments and average values after 20 minutes, in control or after IgG injections. Note that a significant decrease in SPW-R amplitude is observed at the locus of IgG injection. **d:** We compared the local effects of anti-GluA2 antibodies on SWR amplitude in experiments in which it was introduced via the recording pipet (One pipet configuration) or using another pipet than the recording one (two pipet configuration). As can be seen, the decrease in amplitude of SWRs was due to the positive pressure applied in the pipet that probably moved away the tissue locally. Thus we conclude that, as previously observed<sup>15</sup> that AMPAR X-linking was not affecting basal transmission, and thus leave spontaneous SWRs unaffected. t-test were used. In case that sample distribution was not normal – after Shapiro-Wilk test – a Mann-Whitney Rank Sum test was used. \*p<0.05. The number of independent experiments is indicated.

Sup. Table: statistical tests.

| Figure 1 | Panel         | condition         | Test          | stats             |            |               |   |        |        |             |         |        |        |     |
|----------|---------------|-------------------|---------------|-------------------|------------|---------------|---|--------|--------|-------------|---------|--------|--------|-----|
| Figure 1 | d             | pre learning      | two way anova | session           | Comparison | Diff of Means | t | P      |        |             |         |        |        |     |
|          |               |                   |               |                   |            |               |   |        | 1      | FAB vs. IGG | 0,0496  | 0,368  | 0,713  |     |
|          |               |                   |               |                   |            |               |   |        | 2      | IGG vs. FAB | 0,0289  | 0,214  | 0,83   |     |
|          |               |                   |               |                   |            |               |   |        | 3      | IGG vs. FAB | 0,138   | 1,021  | 0,308  |     |
|          |               |                   |               |                   |            |               |   |        | 4      | IGG vs. FAB | 0,14    | 1,043  | 0,298  |     |
|          |               |                   |               |                   |            |               |   |        | 5      | IGG vs. FAB | 0,581   | 4,315  | <0,001 | *** |
|          |               |                   |               |                   |            |               |   |        | 6      | IGG vs. FAB | 0,544   | 3,973  | <0,001 | *** |
|          |               |                   |               |                   |            |               |   |        | 7      | IGG vs. FAB | 0,272   | 2,019  | 0,044  | **  |
|          |               |                   |               |                   |            |               |   |        | 8      | IGG vs. FAB | 0,254   | 1,887  | 0,06   |     |
|          |               |                   |               |                   |            |               |   |        | 9      | IGG vs. FAB | 0,253   | 1,881  | 0,061  |     |
|          | 10            | IGG vs. FAB       | 0,173         | 1,266             | 0,207      |               |   |        |        |             |         |        |        |     |
|          | d             | Pre rest          | two way anova | session           | Comparison | Diff of Means | t | P      |        |             |         |        |        |     |
|          |               |                   |               |                   |            |               |   |        | 1      | Fab vs. IgG | 0,128   | 0,744  | 0,458  |     |
|          |               |                   |               |                   |            |               |   |        | 2      | IgG vs. Fab | 0,0306  | 0,177  | 0,86   |     |
|          |               |                   |               |                   |            |               |   |        | 3      | IgG vs. Fab | 0,322   | 1,868  | 0,064  |     |
|          |               |                   |               |                   |            |               |   |        | 4      | Fab vs. IgG | 0,0756  | 0,438  | 0,662  |     |
|          |               |                   |               |                   |            |               |   |        | 5      | IgG vs. Fab | 0,538   | 3,118  | 0,002  | **  |
|          |               |                   |               |                   |            |               |   |        | 6      | IgG vs. Fab | 0,426   | 2,47   | 0,015  | *   |
|          |               |                   |               |                   |            |               |   |        | 7      | IgG vs. Fab | 0,322   | 1,865  | 0,064  |     |
|          |               |                   |               |                   |            |               |   |        | 8      | IgG vs. Fab | 0,244   | 1,414  | 0,16   |     |
|          |               |                   |               |                   |            |               |   |        | 9      | IgG vs. Fab | 0,136   | 0,786  | 0,433  |     |
|          | 10            | IgG vs. Fab       | 0,172         | 0,998             | 0,32       |               |   |        |        |             |         |        |        |     |
|          | d             | pre test          | two way anova | session           | Comparison | Diff of Means | t | P      |        |             |         |        |        |     |
|          |               |                   |               |                   |            |               |   |        | 1      | IGG vs. FAB | 0,0529  | 0,41   | 0,683  |     |
|          |               |                   |               |                   |            |               |   |        | 2      | FAB vs. IGG | 0,0667  | 0,517  | 0,606  |     |
|          |               |                   |               |                   |            |               |   |        | 3      | IGG vs. FAB | 0,005   | 0,0388 | 0,969  |     |
|          |               |                   |               |                   |            |               |   |        | 4      | FAB vs. IGG | 0,104   | 0,807  | 0,422  |     |
|          |               |                   |               |                   |            |               |   |        | 5      | FAB vs. IGG | 0,259   | 2,01   | 0,047  | *   |
|          |               |                   |               |                   |            |               |   |        | 6      | IGG vs. FAB | 0,239   | 1,85   | 0,067  |     |
|          |               |                   |               |                   |            |               |   |        | 7      | IGG vs. FAB | 0,138   | 1,069  | 0,287  |     |
|          |               |                   |               |                   |            |               |   |        | 8      | FAB vs. IGG | 0,266   | 2,066  | 0,041  | *   |
|          |               |                   |               |                   |            |               |   |        | 9      | FAB vs. IGG | 0,18    | 1,396  | 0,166  |     |
|          | 10            | FAB vs. IGG       | 0,089         | 0,69              | 0,491      |               |   |        |        |             |         |        |        |     |
| e        | encoding FAB  | Paired t-test     |               |                   |            |               |   | <0,001 | ***    |             |         |        |        |     |
|          |               |                   | encoding IGG  | Paired t-test     |            |               |   |        | 0,006  | **          |         |        |        |     |
|          |               |                   | Consol.FAB    | Paired t-test     |            |               |   |        | 0,784  |             |         |        |        |     |
|          |               |                   | Consol. IGG   | Paired t-test     |            |               |   |        | <0,001 | ***         |         |        |        |     |
| f        | Consol. FAB   | Paired t-test     |               |                   |            |               |   | 0,378  |        |             |         |        |        |     |
|          |               |                   | Consol.IGG    | Paired t-test     |            |               |   |        | 0,016  | *           |         |        |        |     |
| g        | Consol. FAB   | Paired t-test     |               |                   |            |               |   | 0,964  |        |             |         |        |        |     |
|          |               |                   | Consol. IGG   | Paired t-test     |            |               |   |        | 0,250  |             |         |        |        |     |
| Figure 2 | Panel         | condition         | Test          | stats             |            |               |   |        |        |             |         |        |        |     |
| Figure 2 | a             | VTE no VTE        | Mann-Whitney  |                   |            |               |   |        | 0,002  | **          |         |        |        |     |
|          | c             | FAB noVTE #1 & #5 | t-test        |                   |            |               |   |        | 0,005  | **          |         |        |        |     |
|          |               |                   |               | IGG noVTE #1 & #5 | t-test     |               |   |        |        | 0,862       |         |        |        |     |
|          | d             | VTE errors        | two way anova | session           | Comparison | Diff of Means | t | P      |        |             |         |        |        |     |
|          |               |                   |               |                   |            |               |   |        | 1      | IGG vs. FAB | 0,0159  | 0,23   | 0,818  |     |
|          |               |                   |               |                   |            |               |   |        | 2      | IGG vs. FAB | 0,108   | 1,536  | 0,126  |     |
|          |               |                   |               |                   |            |               |   |        | 3      | IGG vs. FAB | 0,0986  | 1,427  | 0,155  |     |
|          |               |                   |               |                   |            |               |   |        | 4      | IGG vs. FAB | 0,00722 | 0,104  | 0,917  |     |
|          |               |                   |               |                   |            |               |   |        | 5      | IGG vs. FAB | 0,276   | 3,934  | <0,001 | *** |
|          |               |                   |               |                   |            |               |   |        | 6      | IGG vs. FAB | 0,216   | 3,012  | 0,003  | **  |
|          |               |                   |               |                   |            |               |   |        | 7      | IGG vs. FAB | 0,195   | 2,786  | 0,006  | **  |
|          |               |                   |               |                   |            |               |   |        | 8      | IGG vs. FAB | 0,093   | 1,303  | 0,194  |     |
|          |               |                   |               |                   |            |               |   |        | 9      | IGG vs. FAB | 0,099   | 1,366  | 0,173  |     |
|          | 10            | IGG vs. FAB       | 0,125         | 1,641             | 0,102      |               |   |        |        |             |         |        |        |     |
| d        | no VTE errors | two way anova     | session       |                   |            |               |   |        |        |             |         |        |        |     |

|                     |              |                               |               |              |             |        |       |        |     |
|---------------------|--------------|-------------------------------|---------------|--------------|-------------|--------|-------|--------|-----|
|                     |              |                               |               | 1            | FAB vs. IGG | 0,0805 | 1,113 | 0,267  |     |
|                     |              |                               |               | 2            | FAB vs. IGG | 0,094  | 1,3   | 0,195  |     |
|                     |              |                               |               | 3            | FAB vs. IGG | 0,0182 | 0,252 | 0,801  |     |
|                     |              |                               |               | 4            | IGG vs. FAB | 0,0578 | 0,771 | 0,442  |     |
|                     |              |                               |               | 5            | IGG vs. FAB | 0,197  | 2,682 | 0,008  | **  |
|                     |              |                               |               | 6            | IGG vs. FAB | 0,0541 | 0,735 | 0,463  |     |
|                     |              |                               |               | 7            | FAB vs. IGG | 0,0188 | 0,26  | 0,795  |     |
|                     |              |                               |               | 8            | IGG vs. FAB | 0,046  | 0,625 | 0,533  |     |
|                     |              |                               |               | 9            | IGG vs. FAB | 0,0129 | 0,178 | 0,859  |     |
|                     |              |                               |               | 10           | IGG vs. FAB | 0,075  | 1,019 | 0,309  |     |
|                     | e            | no VTE FAB                    | Mann-Whitney  |              |             |        |       | <0,001 | *** |
|                     |              | VTE FAB                       | Mann-Whitney  |              |             |        |       | 0,003  | **  |
|                     |              | no VTE IGG                    | t-test        |              |             |        |       | 0,748  |     |
|                     |              | VTE IGG                       | Mann-Whitney  |              |             |        |       | 0,724  |     |
| <b>Sup Figure 1</b> | <b>Panel</b> | <b>condition</b>              | <b>Test</b>   | <b>stats</b> |             |        |       |        |     |
|                     |              | FAB VTE #1 & #4               | t-test        | 0,009        |             |        |       |        | **  |
|                     |              | IGG VTE #1 & #4               | t-test        | 0,003        |             |        |       |        | **  |
| <b>Figure 3</b>     | <b>Panel</b> | <b>condition</b>              | <b>Test</b>   | <b>stats</b> |             |        |       |        |     |
|                     | c            | frequency                     | Wilcoxon      | 0,497        |             |        |       |        |     |
|                     |              | amplitude                     | Paired t-test | 0,368        |             |        |       |        |     |
|                     | d            | frequency                     | Paired t-test | 0,235        |             |        |       |        |     |
|                     |              | amplitude                     | Wilcoxon      | 0,570        |             |        |       |        |     |
|                     | e            | frequency                     | Paired t-test | 0,029        |             |        |       |        | *   |
|                     |              | amplitude                     | Paired t-test | 0,024        |             |        |       |        | *   |
|                     | f            | frequency                     | Wilcoxon      | 0,313        |             |        |       |        |     |
|                     |              | amplitude                     | Paired t-test | 0,265        |             |        |       |        |     |
| <b>Figure 4</b>     | <b>Panel</b> | <b>measure</b>                | <b>Test</b>   | <b>stats</b> |             |        |       |        |     |
|                     | h            | CA3 IGG & Ctl Hz              | t-test        | 0,756        |             |        |       |        |     |
|                     |              | CA1 IGG & Ctl Hz              | t-test        | 0,803        |             |        |       |        |     |
| <b>Sup Figure 5</b> | <b>Panel</b> | <b>measure</b>                | <b>Test</b>   | <b>stats</b> |             |        |       |        |     |
|                     | c            | CA1 EPSP ampl CA1 IGG VS Ctrl | t-test        | 0,225        |             |        |       |        |     |
|                     |              | CA3 EPSP ampl CA1 IGG VS Ctrl | t-test        | 0,024        |             |        |       |        | *   |
|                     |              | CA1 EPSP ampl CA3 IGG VS Ctrl | t-test        | 0,962        |             |        |       |        |     |
|                     |              | CA3 EPSP ampl CA3 IGG VS Ctrl | Mann Whitney  | 0,028        |             |        |       |        | *   |
|                     | d            | ampl. SPWR 1pip VS before     | Mann Whitney  | 0,038        |             |        |       |        | *   |
|                     |              | ampl. SPWR 2pip VS before     | Mann Whitney  | 0,534        |             |        |       |        |     |
| <b>Figure 5</b>     | <b>Panel</b> | <b>condition</b>              | <b>Test</b>   | <b>stats</b> |             |        |       |        |     |
|                     | c            | EPSP slope early              | wilcoxon      | 0,031        |             |        |       |        | *   |
|                     |              | EPSP slope late               | paired t-test | 0,012        |             |        |       |        | *   |
|                     |              | SPWR freq early               | wilcoxon      | 0,310        |             |        |       |        |     |
|                     |              | SPWR freq late                | wilcoxon      | 0,020        |             |        |       |        | *   |
|                     | e            | EPSP slope early IGG          | paired t-test | 0,007        |             |        |       |        | **  |
|                     |              | EPSP slope late IGG           | paired t-test | 0,555        |             |        |       |        |     |
|                     |              | EPSP slope early IGG/Ctrl     | Mann-Whitney  | <0,001       |             |        |       |        | *** |
|                     |              | EPSP slope late IGG/ctrl      | t-test        | 0,004        |             |        |       |        | **  |
|                     |              | SPWR freq early IGG           | paired t-test | 0,061        |             |        |       |        |     |
|                     |              | SPWR freq late IGG            | paired t-test | 0,335        |             |        |       |        |     |
|                     |              | SPWR freq early IGG/Ctrl      | Mann-Whitney  | 0,02         |             |        |       |        | *   |
|                     |              | SPWR freq late IGG/Ctrl       | Mann-Whitney  | 0,138        |             |        |       |        |     |
| <b>Figure 6</b>     | <b>Panel</b> | <b>condition</b>              | <b>Test</b>   | <b>stats</b> |             |        |       |        |     |
|                     | d            | controls                      | paired t-test | <0,001       |             |        |       |        | *** |
|                     | d            | BIRA+NA                       | paired t-test | 0,501        |             |        |       |        |     |
|                     | e            | controls                      | t-test        | 0,008        |             |        |       |        | **  |
|                     | e            | BIRA+NA                       | t-test        | 0,635        |             |        |       |        |     |
| <b>Figure 7</b>     | <b>Panel</b> | <b>condition</b>              | <b>Test</b>   | <b>stats</b> |             |        |       |        |     |
|                     | b            | controls                      | paired t-test | 0,571        |             |        |       |        |     |
|                     | b            | BIRA+NA                       | paired t-test | 0,022        |             |        |       |        | *   |
